# Supplementary material for: Systemic clearance of p16INK4a‐positive senescent cells mitigates age‐associated intervertebral disc degeneration
Source: PubMed Central journal article supplement (PMC6516165; doi:10.1111/acel.12927), 2019-03-21

Supplemental figure S1

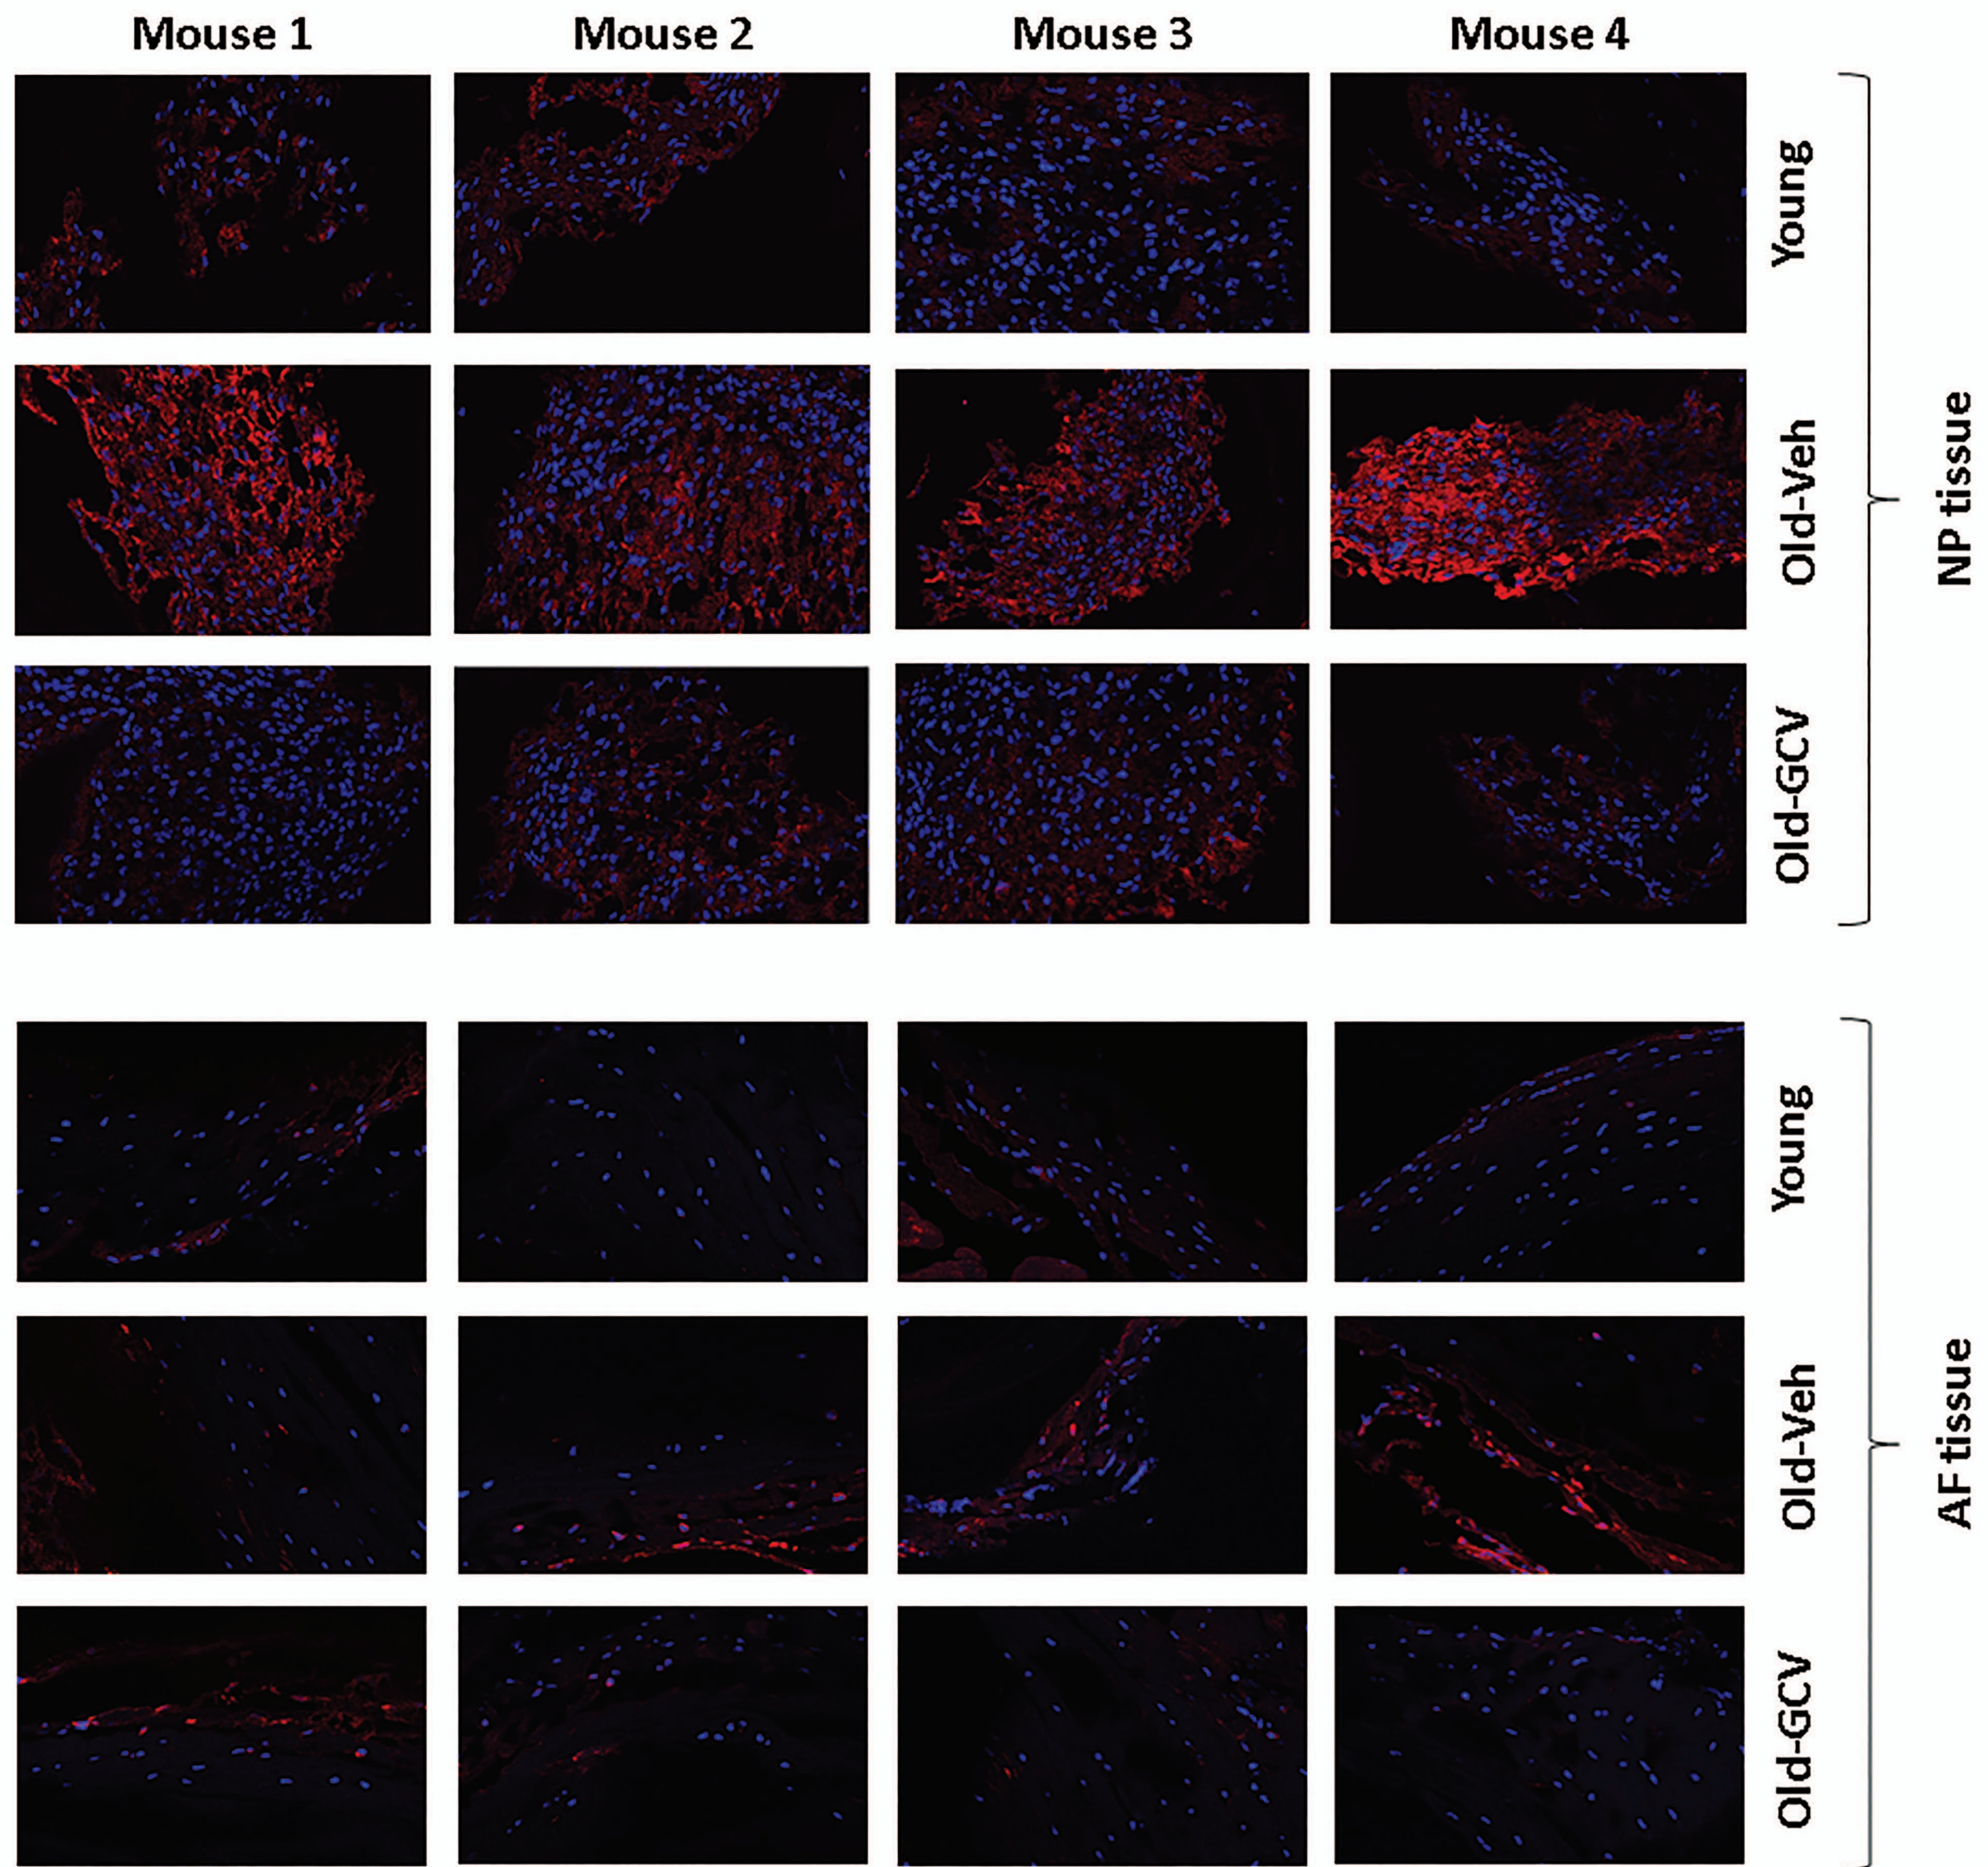

**DAPI: Blue**  
**RFP: RED**

NP negative control

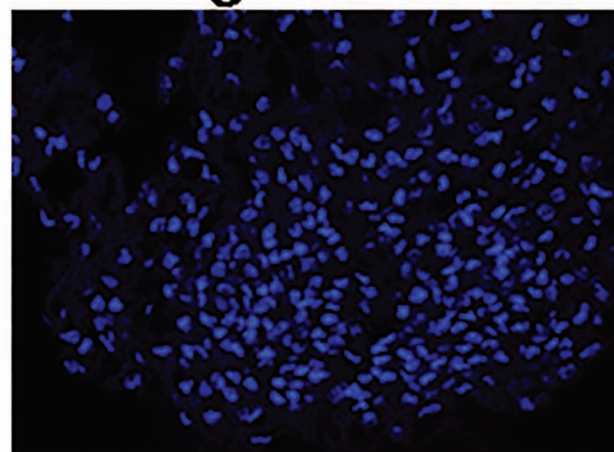

AF negative control

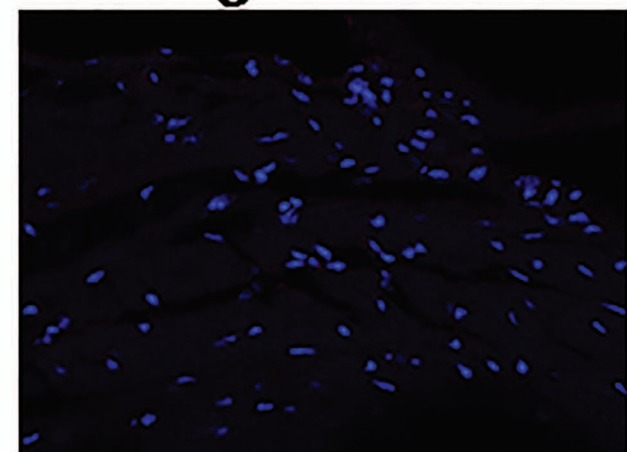



Supplemental figure S2

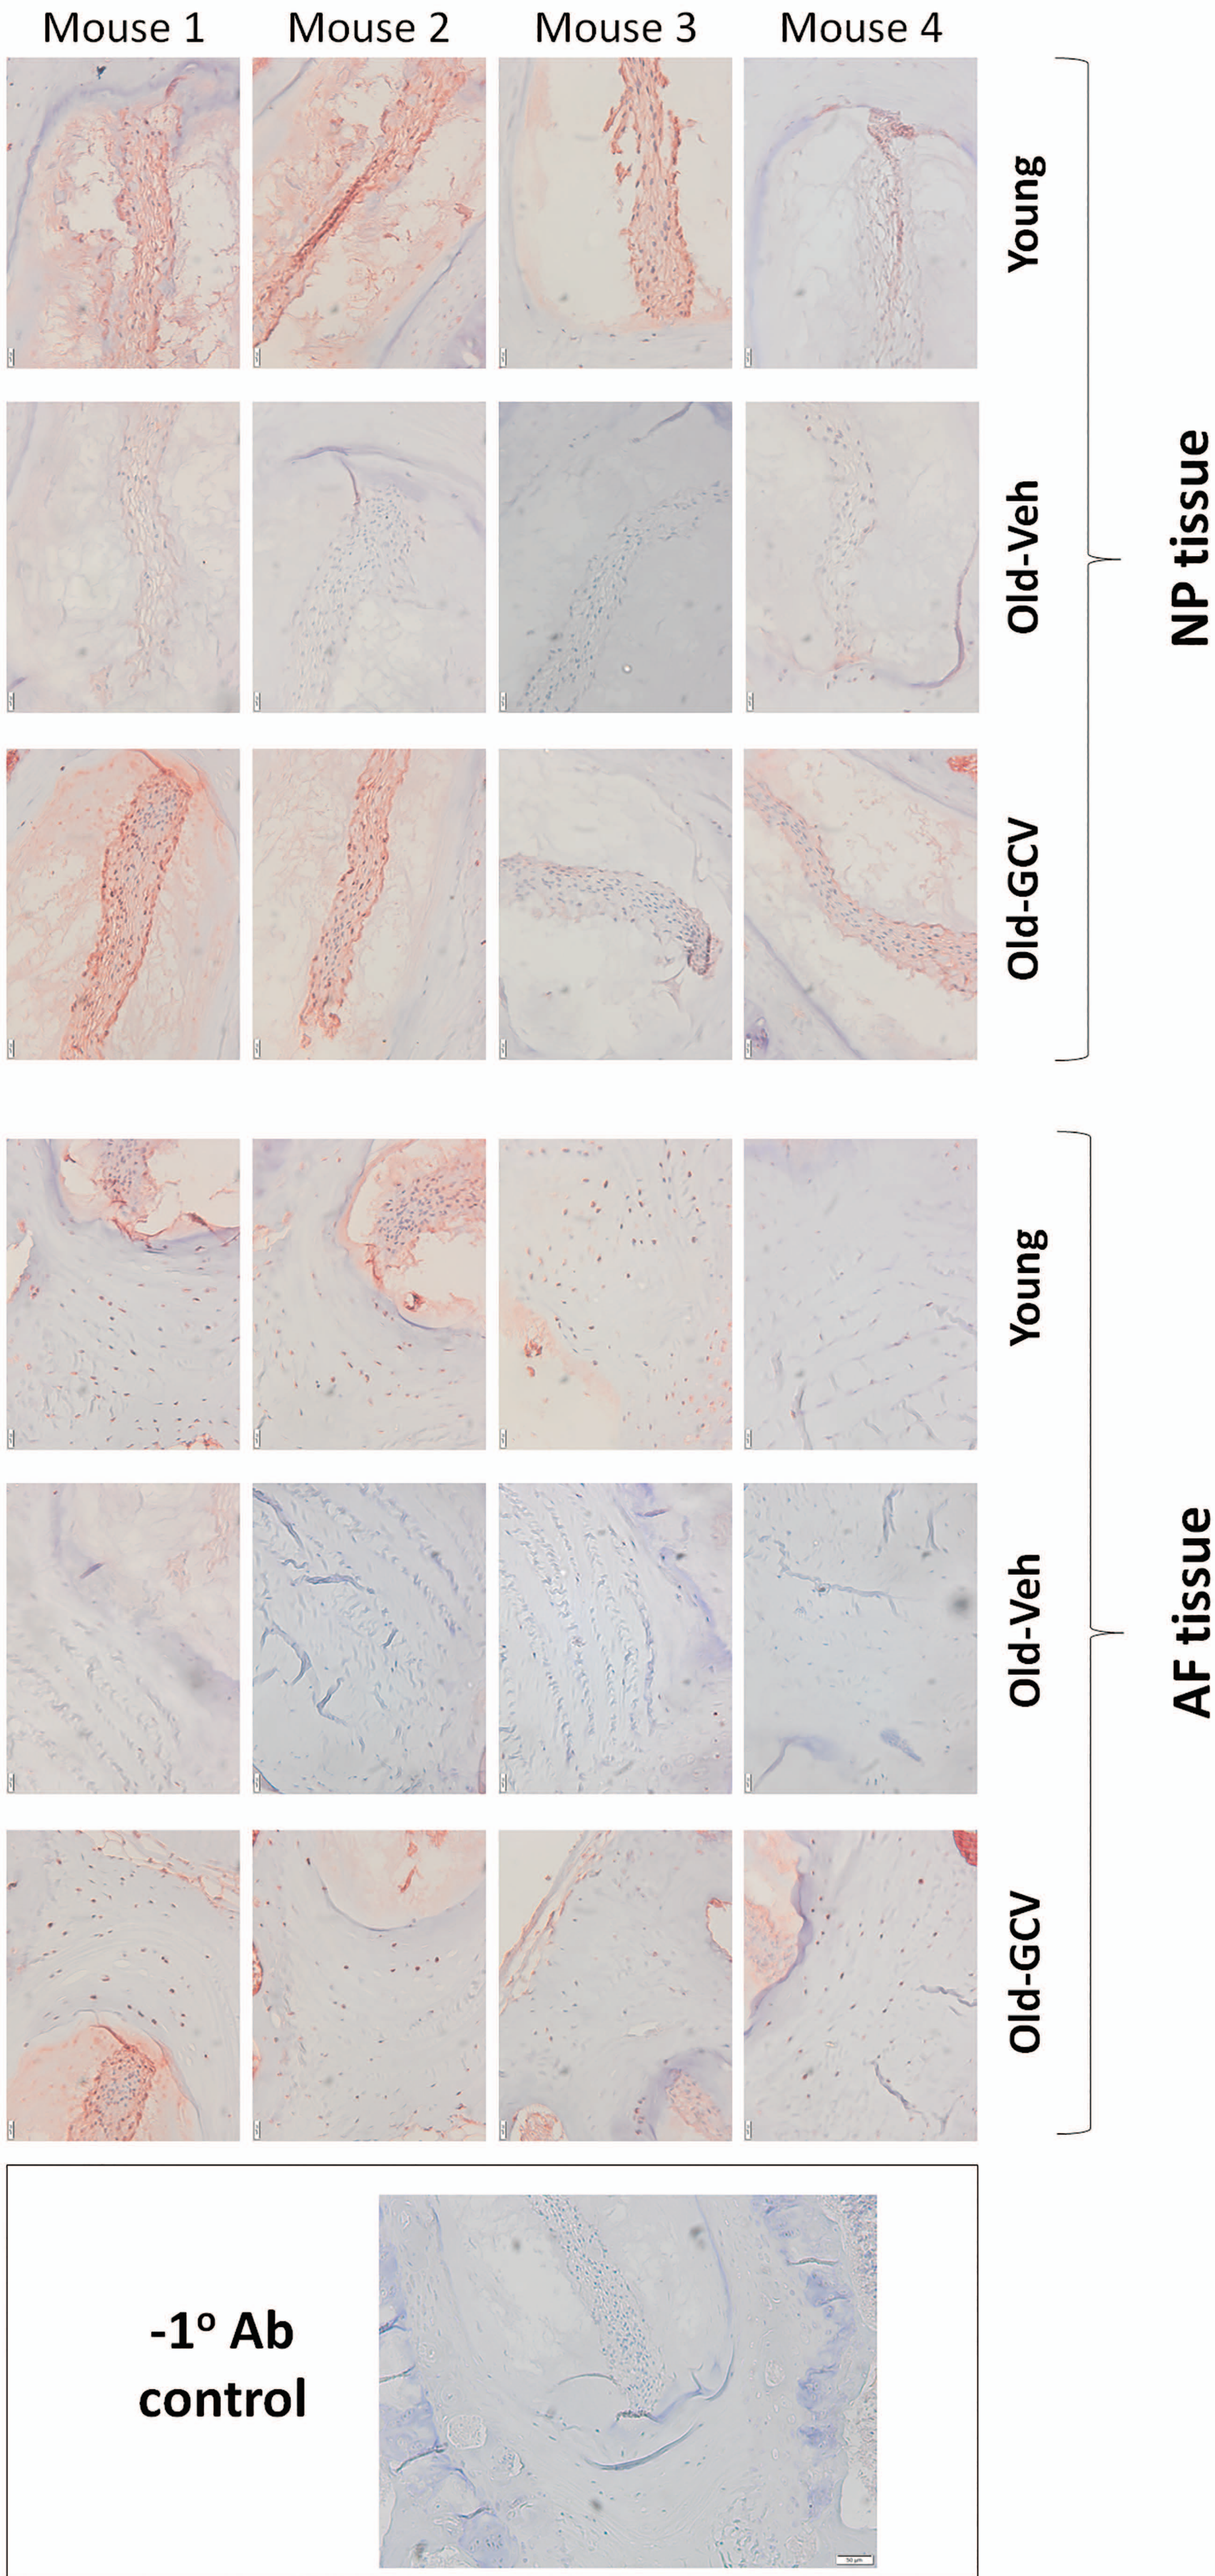



## Supplemental figure S3

Young

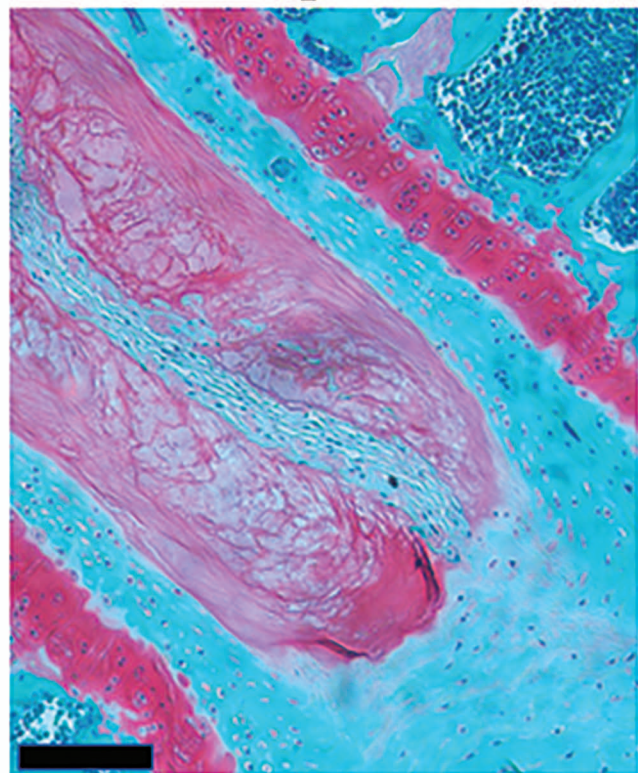

Old-Vehicle

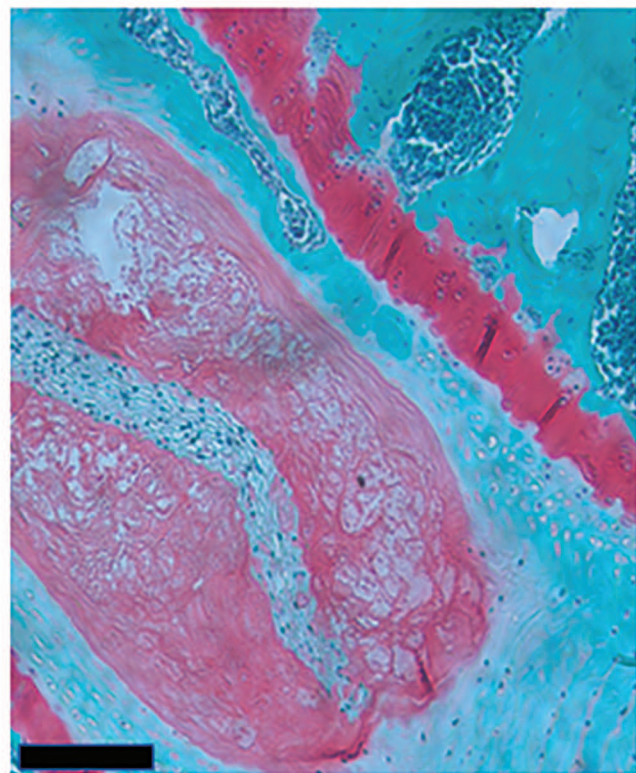

Old-GCV

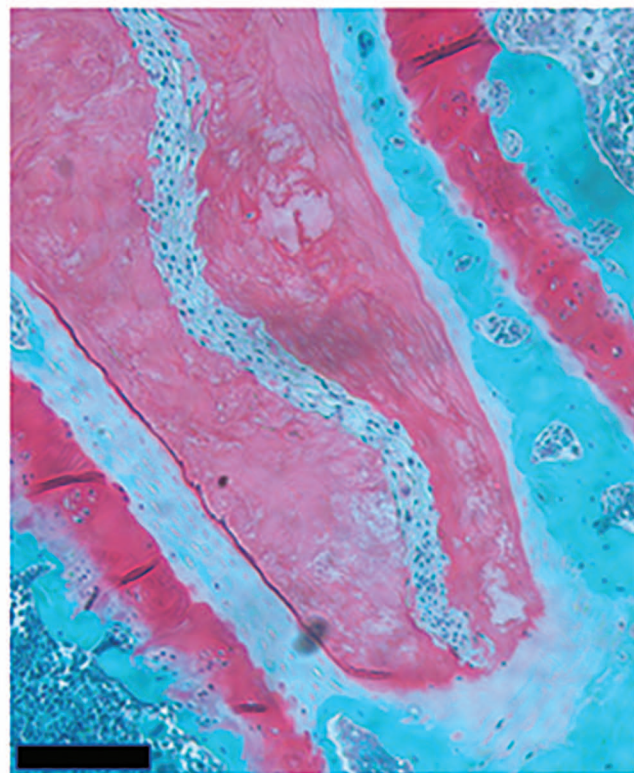

## Supplemental figure S4

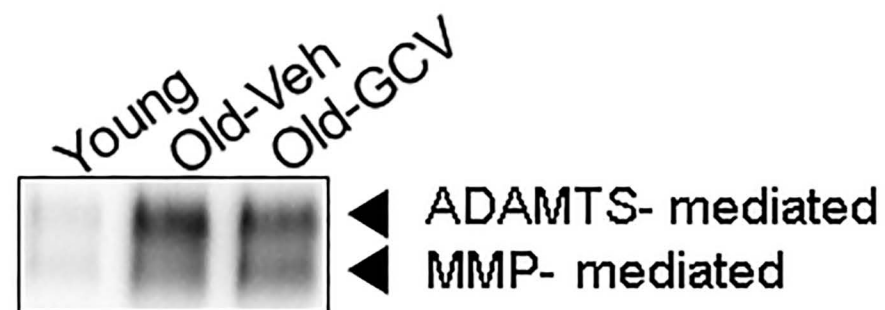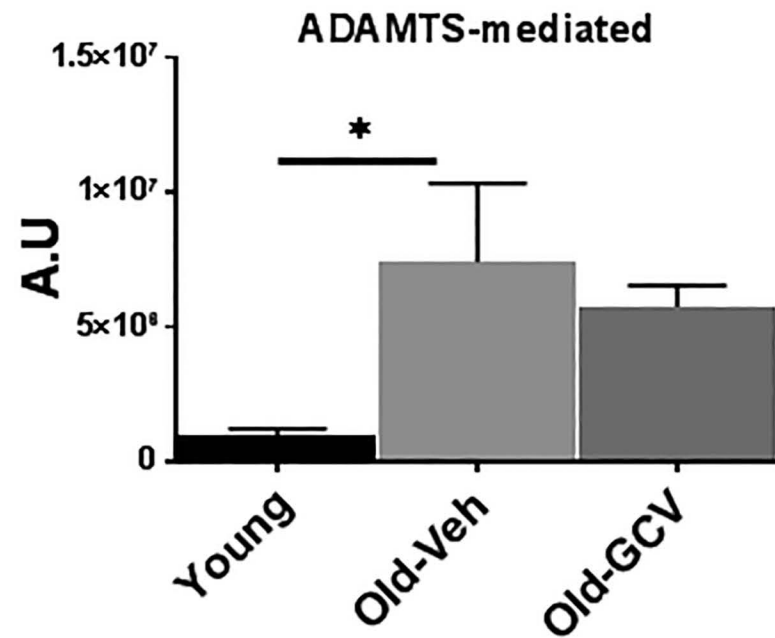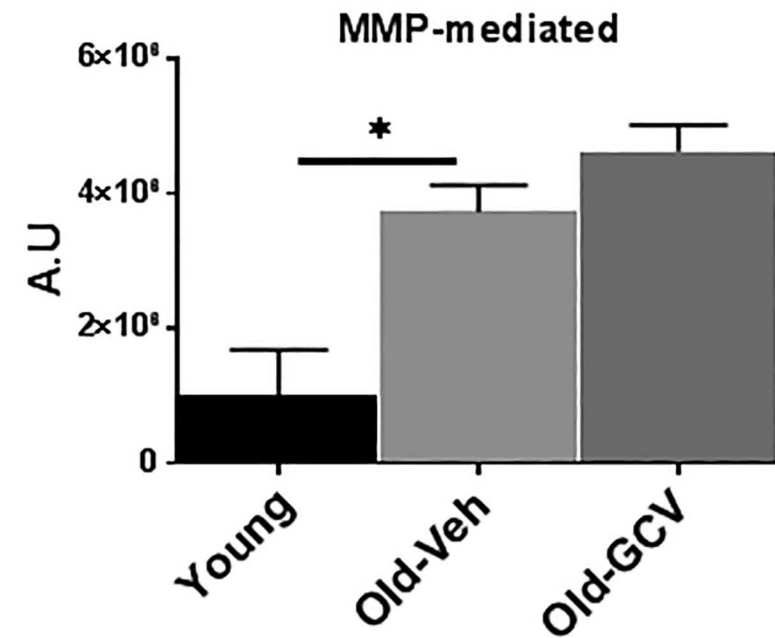

## Supplemental figure S5

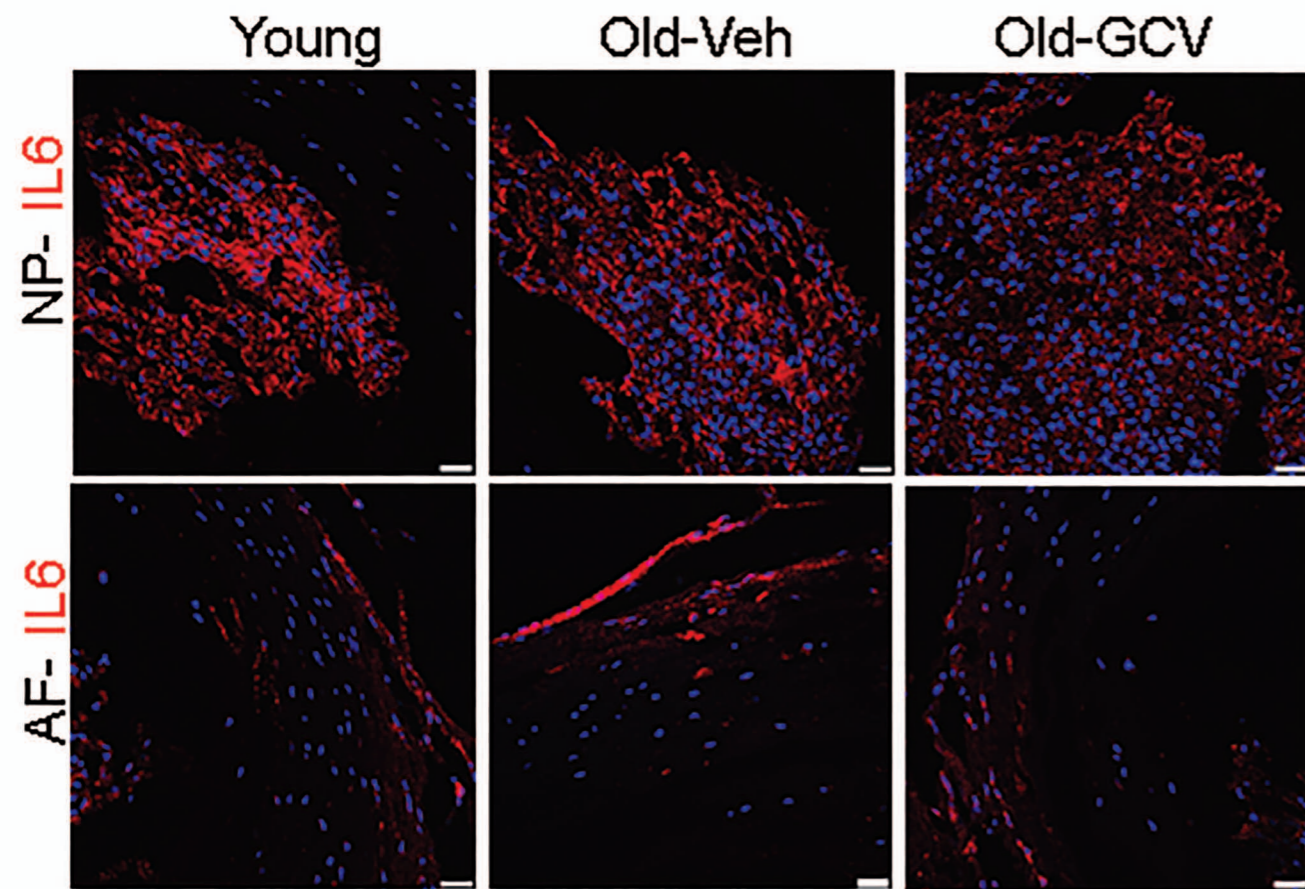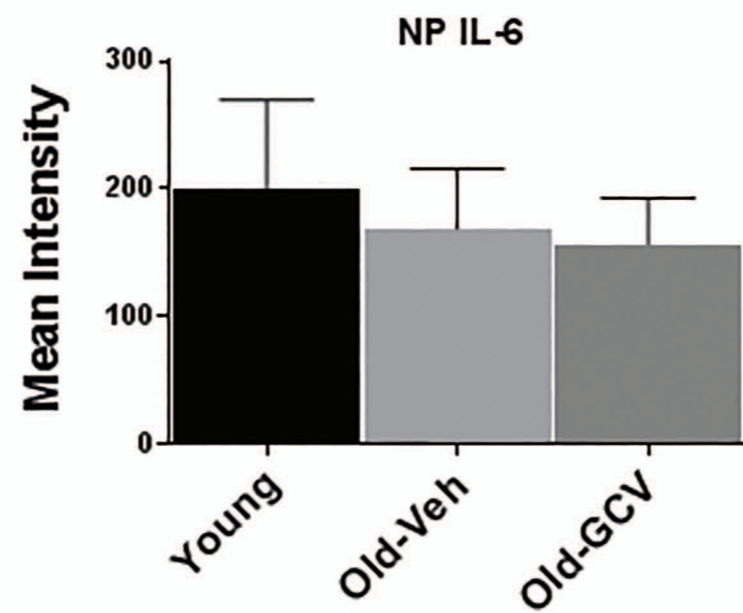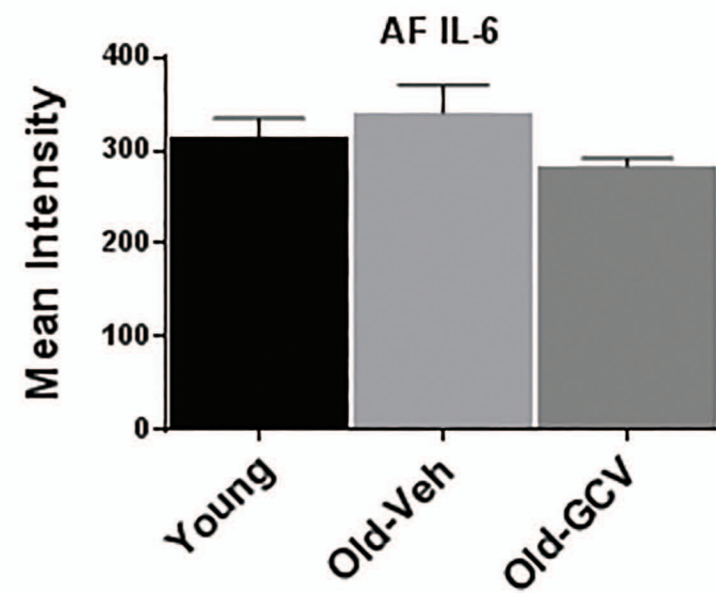

Supplement: ACEL-18-e12927-s001.pdf [file ACEL-18-e12927-s001.pdf]
